# Supplementary material for: Time-Course Transcriptome Profiling Reveals Differential Resistance Responses of Tomato to a Phytotoxic Effector of the Pathogenic Oomycete Phytophthora cactorum
Source: MDPI journal article supplement (doi:10.3390/plants12040883), 2023-02-15
Supplement: s1 [file s1]

|                 |   |    |   |    |   |    |   |    |   |    |   |    |
|-----------------|---|----|---|----|---|----|---|----|---|----|---|----|
|                 |   | 10 |   | 20 |   | 30 |   | 40 |   | 50 |   | 60 |
| SCR96           | G | A  | G | G  | A | G  | C | A  | G | G  | C | T  |
|                 | E | E  | Q | A  | S | V  | H | L  | R | V  | H | T  |
| SCR96-optimized | G | A  | G | A  | G | C  | A | G  | G | C  | T | T  |
|                 | E | E  | Q | A  | S | V  | H | L  | R | V  | H | T  |

|                 |   |    |   |    |   |    |   |     |   |     |   |     |
|-----------------|---|----|---|----|---|----|---|-----|---|-----|---|-----|
|                 |   | 70 |   | 80 |   | 90 |   | 100 |   | 110 |   | 120 |
| SCR96           | A | T  | C | T  | G | C  | T | A   | C | C   | A | G   |
|                 | I | C  | Y | Q  | A | C  | Q | S   | G | Q   | Y | C   |
| SCR96-optimized | A | T  | T | G  | T | T  | A | C   | C | A   | G | T   |
|                 | I | C  | Y | Q  | A | C  | Q | S   | G | Q   | Y | C   |

|                 |   |     |   |     |   |     |   |     |   |     |   |     |
|-----------------|---|-----|---|-----|---|-----|---|-----|---|-----|---|-----|
|                 |   | 130 |   | 140 |   | 150 |   | 160 |   | 170 |   | 180 |
| SCR96           | G | C   | C | C   | G | A   | C | T   | G | G   | C | A   |
|                 | A | P   | T | G   | N | Q   | C | F   | N | P   | A | T   |
| SCR96-optimized | G | C   | T | C   | C | A   | C | T   | G | G   | C | A   |
|                 | A | P   | T | G   | N | Q   | C | F   | N | P   | A | T   |

|                 |   |     |   |     |   |     |   |
|-----------------|---|-----|---|-----|---|-----|---|
|                 |   | 190 |   | 200 |   | 210 |   |
| SCR96           | C | C   | G | G   | C | T   | T |
|                 | P | G   | F | K   | C | D   | K |
| SCR96-optimized | C | C   | T | G   | G | T   | T |
|                 | P | G   | F | K   | C | D   | K |
