# Supplementary figures and images for: Time-Course Transcriptome Profiling Reveals Differential Resistance Responses of Tomato to a Phytotoxic Effector of the Pathogenic Oomycete Phytophthora cactorum
Source: MDPI journal article supplement (doi:10.3390/plants12040883), 2023-02-15

0 3 6 12

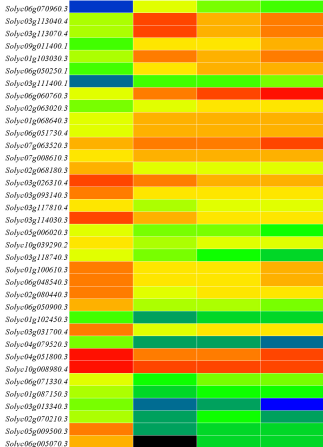

15  
13  
12  
11  
10  
9  
8  
7  
6  
5  
4  
3  
2  
1  
0

Supplement: s1 [file s1]

***RLKs***

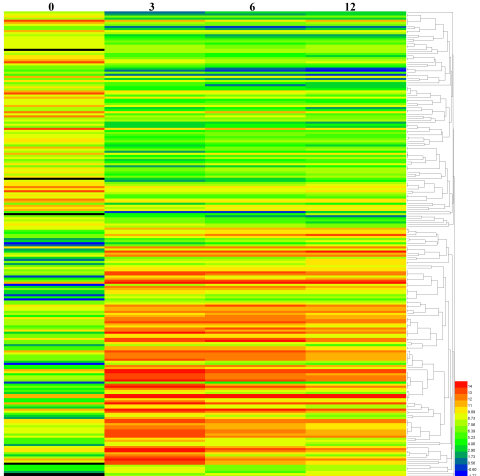

***RLPs***

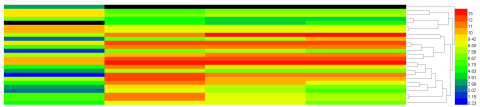

Supplement: s1 [file s1]

# Statistics of Pathway Enrichment

Pathway Name

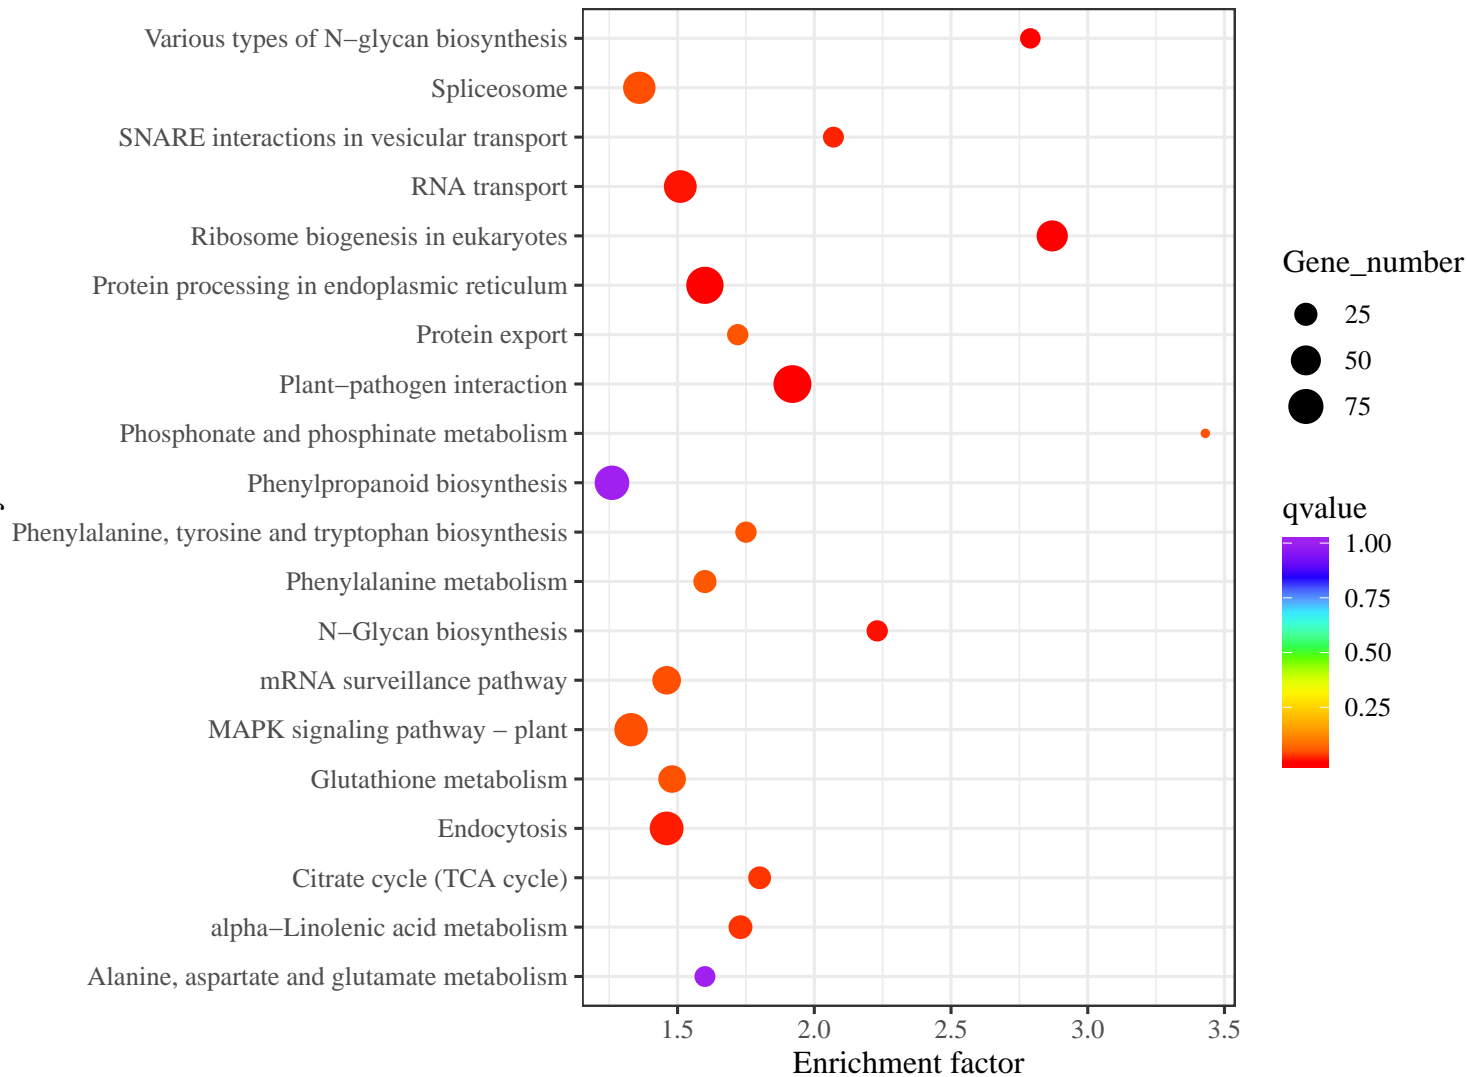

Supplement: s1 [file s1]

**a**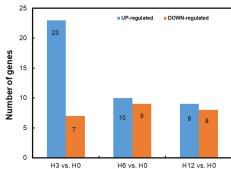**b**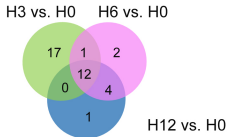**c**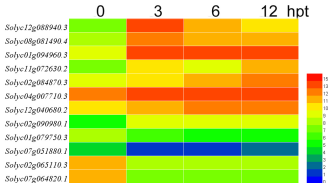

Supplement: s1 [file s1]

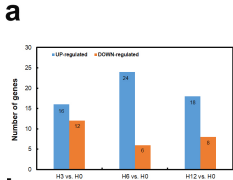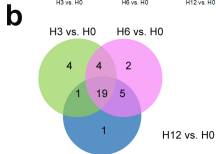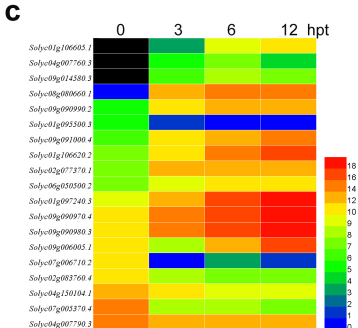

Supplement: s1 [file s1]

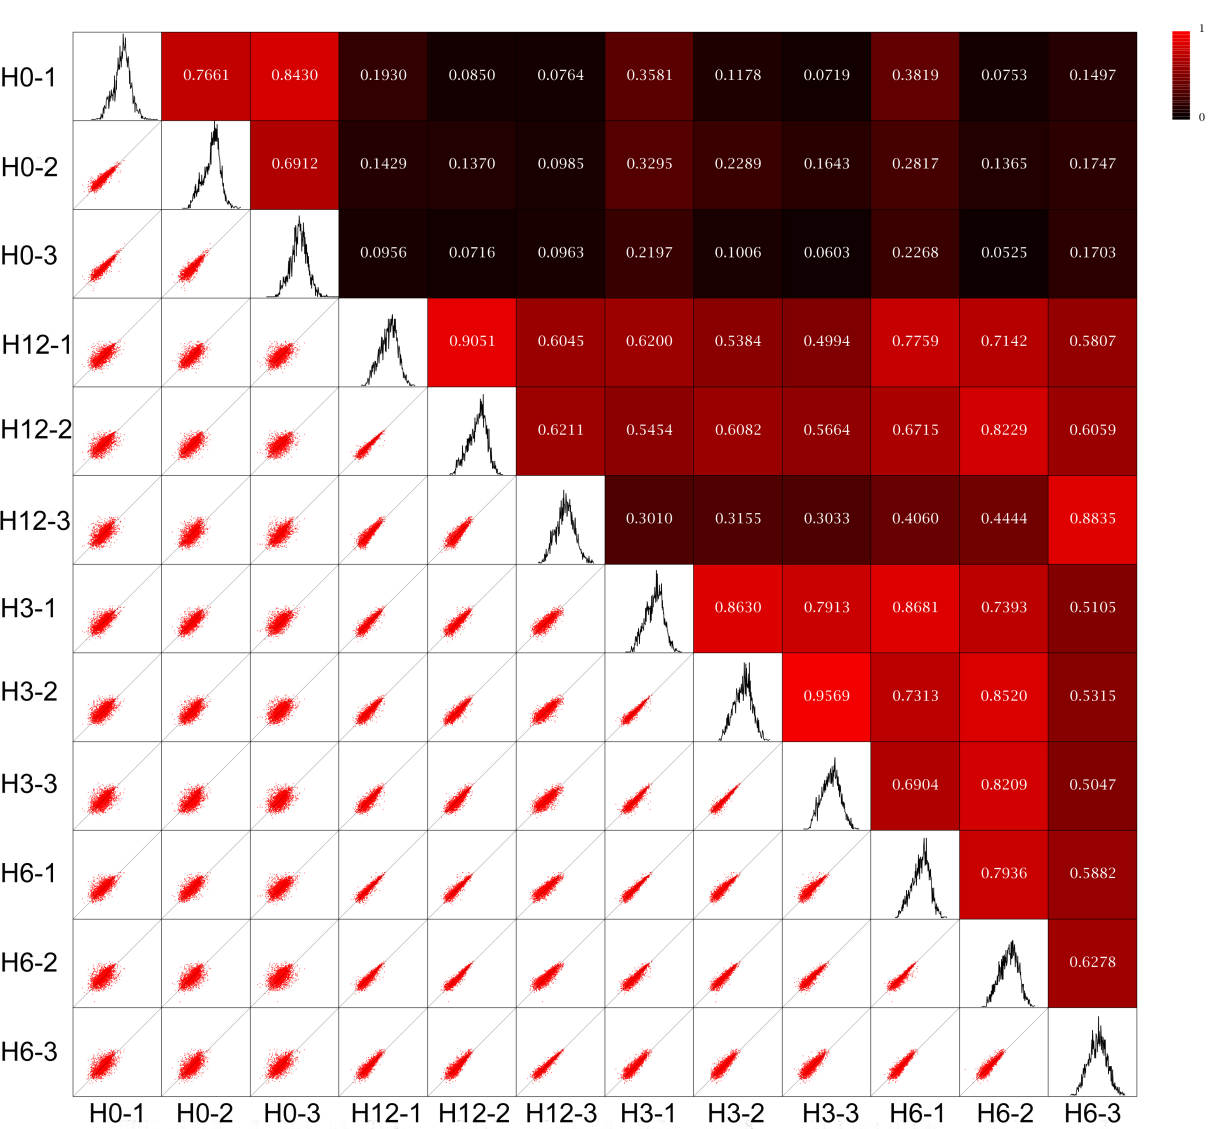

Supplement: s1 [file s1]
